# Supplementary material for: Stable cycling of Prussian blue/Zn battery in a nonflammable aqueous/organic hybrid electrolyte
Source: Royal Society of Chemistry journal article supplement (doi:10.1039/d1ra05369h), 2021-01-01
Supplement: d1ra05369h1.pdf [file d1ra05369h1.pdf]

## Supporting Information

### Stable cycling of Prussian blue/Zn battery in a nonflammable aqueous/organic hybrid electrolyte

Zheng Xu,<sup>‡a</sup> Bo Xiang,<sup>b</sup> Chunli Liu,<sup>‡a</sup> Yunpo Sun,<sup>a</sup> Jian Xie,<sup>\*a</sup> Jian Tu,<sup>c</sup> Xiongwen Xu<sup>c</sup> and Xinbing Zhao<sup>a</sup>

---

<sup>a</sup> State Key Laboratory of Silicon Materials, School of Materials Science and Engineering, Zhejiang University, Hangzhou 310027, P. R. China. E-mail: xiejian1977@zju.edu.cn; Fax: +86-571-87951451; Tel: +86-571-87952181

<sup>b</sup> Huayou New Energy Technology (Quzhou) Co., Ltd., Quzhou 324000, P. R. China

<sup>c</sup> LI-FUN Technology Corporation Limited, Zhuzhou 412000, P. R. China

<sup>‡</sup>Zheng Xu and Chunli Liu contributed equally to this work.

**Table S1.** Comparison of cycling performance of various battery systems.

| <b>Cathode//Anode</b>   | <b>Electrolyte</b>                                                                               | <b>Current density</b>    | <b>Initial capacity (mAh g<sup>-1</sup>)</b> | <b>Cycle number</b> | <b>Capacity retention</b> | <b>Reference</b> |
|-------------------------|--------------------------------------------------------------------------------------------------|---------------------------|----------------------------------------------|---------------------|---------------------------|------------------|
| <b>FeHCF//Zn</b>        | <b>Aqueous 1 m NaTfO and 0.1 m Zn(TfO)<sub>2</sub> in ACN/H<sub>2</sub>O</b>                     | <b>1 A g<sup>-1</sup></b> | <b>69.1</b>                                  | <b>19000</b>        | <b>51.4%</b>              | <b>This work</b> |
| CoHCF//Zn               | 4 M Zn(BF <sub>4</sub> ) <sub>2</sub> in in-situ poly(1,3-dioxolane, DOL) SPE                    | 0.5 A g <sup>-1</sup>     | ~160                                         | 20000               | ~66%                      | [1]              |
| CoHCF//Zn               | PVDF-HFP-PEO SPE with 2 M Zn(BF <sub>4</sub> ) <sub>2</sub> / [EMIM]BF <sub>4</sub> ionic liquid | 2 A g <sup>-1</sup>       | 103.4                                        | 30000               | 90%                       | [2]              |
| MnHCF//Al               | Aqueous 1 M Al(TfO) <sub>3</sub>                                                                 | 0.5 A g <sup>-1</sup>     | 82.1                                         | 100                 | 69.5%                     | [3]              |
| KCuHCF//Zn              | Aqueous 0.5 M Zn(TfO) <sub>2</sub> in TEP/H <sub>2</sub> O                                       | 1C                        | 73.3                                         | 1000                | 74%                       | [4]              |
| Graphite//Zn            | 1 M Zn(TFSI) <sub>2</sub> in ACN                                                                 | 1 A g <sup>-1</sup>       | 42                                           | 4000                | 82%                       | [5]              |
| δ-MnO <sub>2</sub> //Zn | 0.3 M ZnCl <sub>2</sub> in ChCl/urea                                                             | 0.1 A g <sup>-1</sup>     | 72                                           | 150                 | ~50%                      | [6]              |

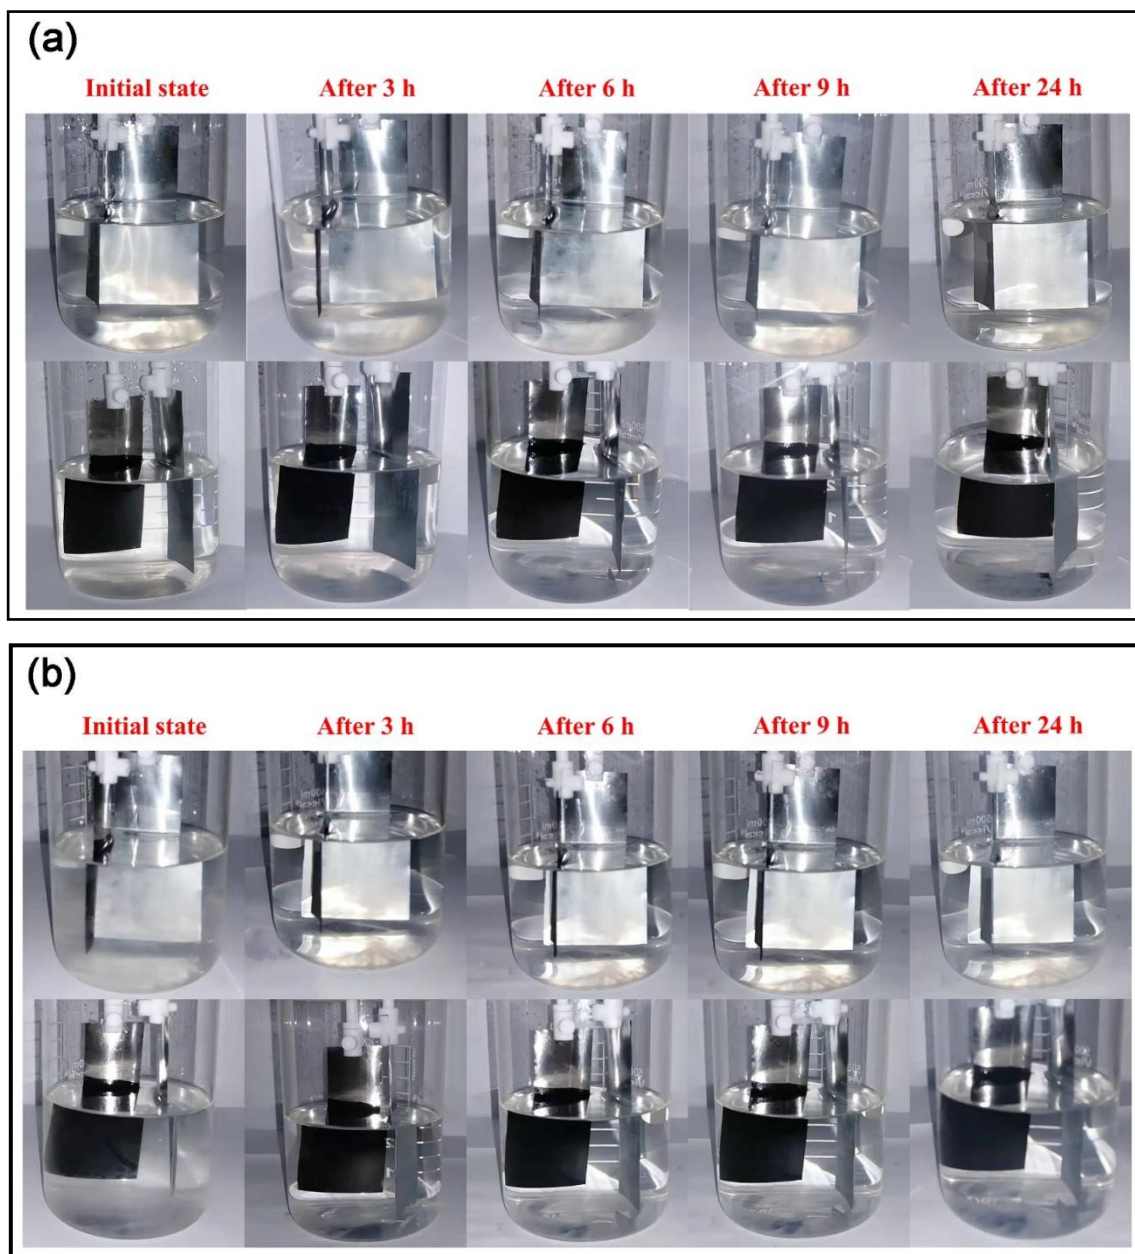

**Fig. S1.** Gas evolution experiments of the aqueous battery in the idle mode using ACN-50 electrolyte. (a) Images of the aqueous battery after rest for various durations after charge to 1.2 V. (b) Images of the aqueous battery after rest for various duration after subsequent discharge to 0.7 V.

## References

- 1 L. T. Ma, S. M. Chen, X. L. Li, A. Chen, B. B. Dong and C. Y. Zhi, *Angew. Chem. Int. Ed.*, 2020, **59**, 23836–23844.
- 2 L. T. Ma, S. M. Chen, N. Li, Z. X. Liu, Z. J. Tang, J. A. Zapien, S. M. Chen, J. Fan and C. Y. Zhi, *Adv. Mater.*, 2020, **32**, 1908121.
- 3 D. H. Wang, H. M. Lv, T. Hussain, Q. Yang, G. J. Liang, Y. W. Zhao, L. T. Ma, Q. Li, H. F. Li, B. B. Dong, T. Kaewmaraya and C. Y. Zhi, *Nano Energy*, 2021, **84**, 105945.
- 4 A. Naveed, H. J. Yang, J. Yang, Y. Nuli and J. L. Wang, *Angew. Chem. Int. Ed.*, 2019, **58**, 2760–2764.
- 5 N. Zhang, Y. Dong, Y. Y. Wang, Y. X. Wang, J. J. Li, J. Z. Xu, Y. C. Liu, L. F. Jiao and F. Y. Cheng, *ACS Appl. Mater. Inter.*, 2019, **11**, 32978–32986.
- 6 W. Kao. Ian, R. Pornprasertsuk, P. Thamyongkit, T. Maiyalagan and S. Kheawhom, *J. Electrochem. Soc.*, 2019, **166**, A1063–A1069.
